# Supplementary material
Source: PubMed Central journal article supplement (PMC1413647)

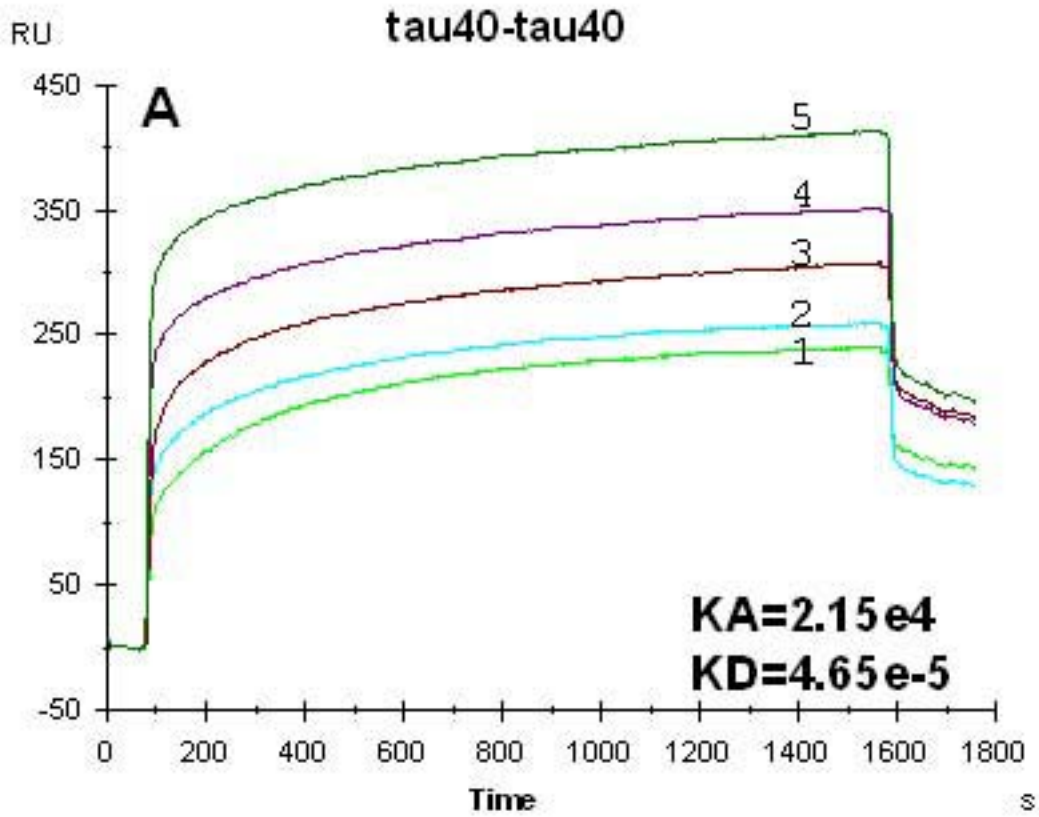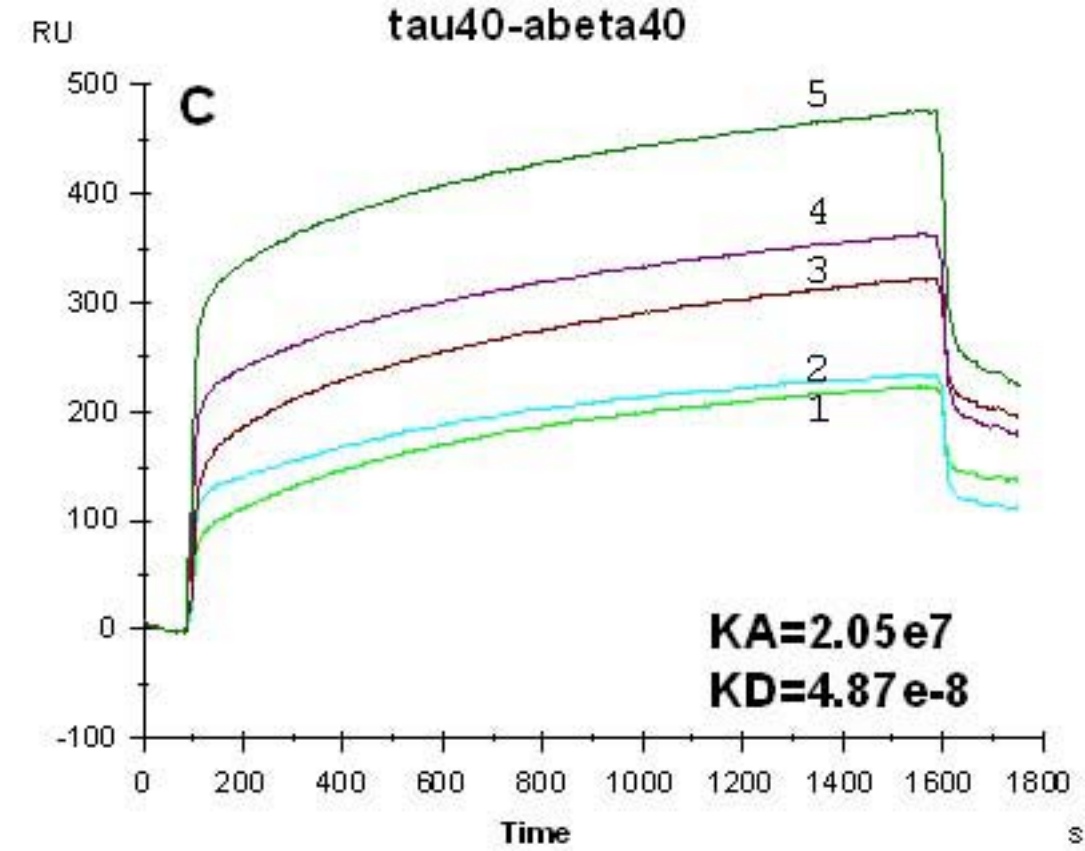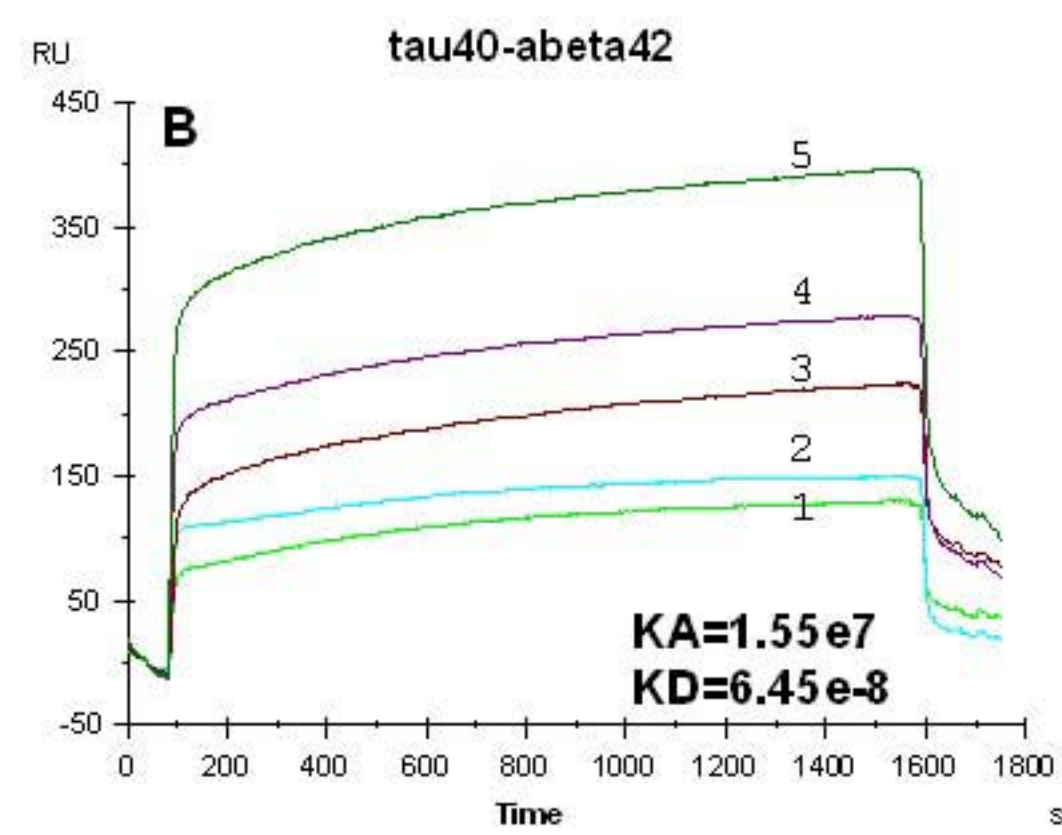

- 1 — 40nmol/L tau40
- 2 — 80nmol/L tau40
- 3 — 320nmol/L tau40
- 4 — 640nmol/L tau40
- 5 — 1280nmol/L tau40

Supplement: pnas_0509386103_1.pdf [file pnas_0509386103_1.pdf]

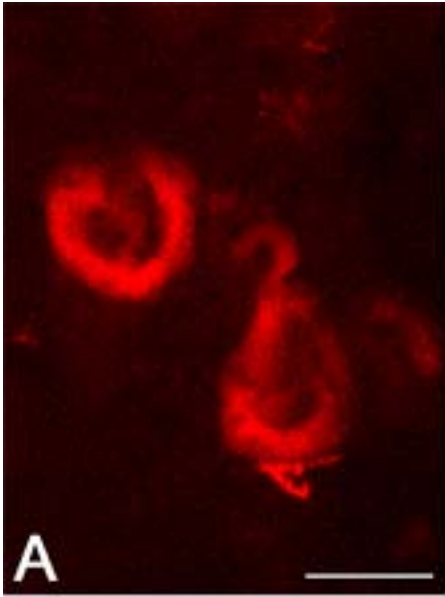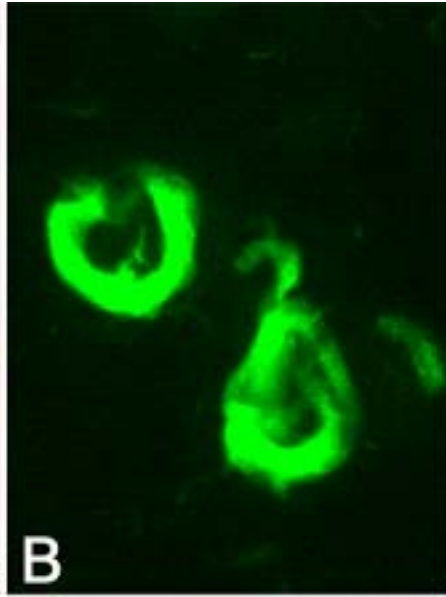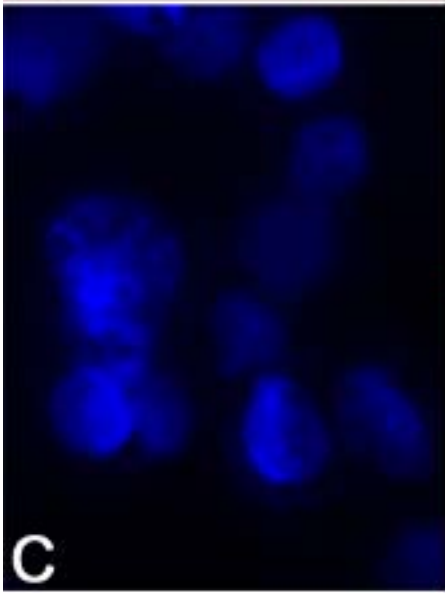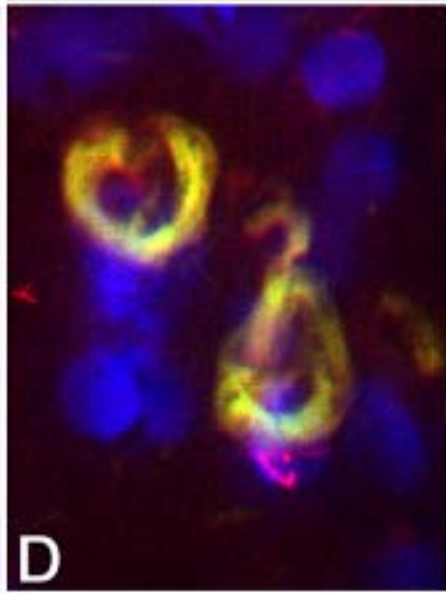

Supplement: pnas_0509386103_2.pdf [file pnas_0509386103_2.pdf]
